# Supplementary material
Source: MDPI journal article supplement (https://www.mdpi.com/2073-4441/13/23/3383)
Supplement: s1 [file s1 › water-1421137-supplementary.pdf]

# Calibration of the Activated Sludge Model No.2d to simulate an OSA pilot plant fed with real wastewater

## Supplementary Material

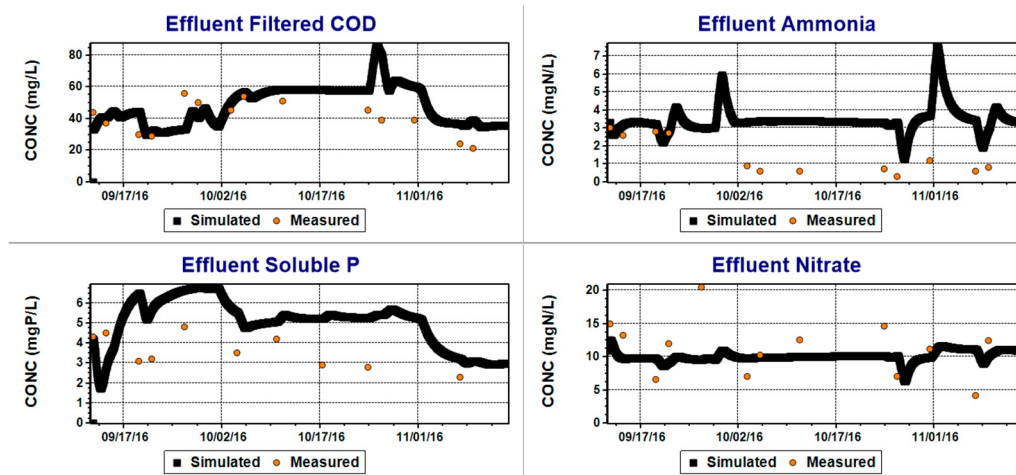

Figure S1. Period I – Effluent simulated concentrations VS measured

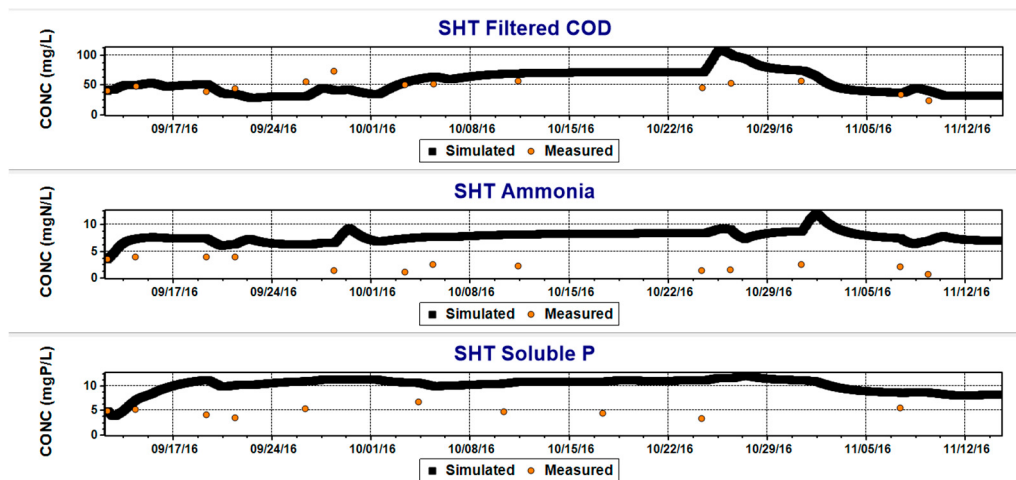

Figure S2. Period I – SHT simulated concentrations VS measured

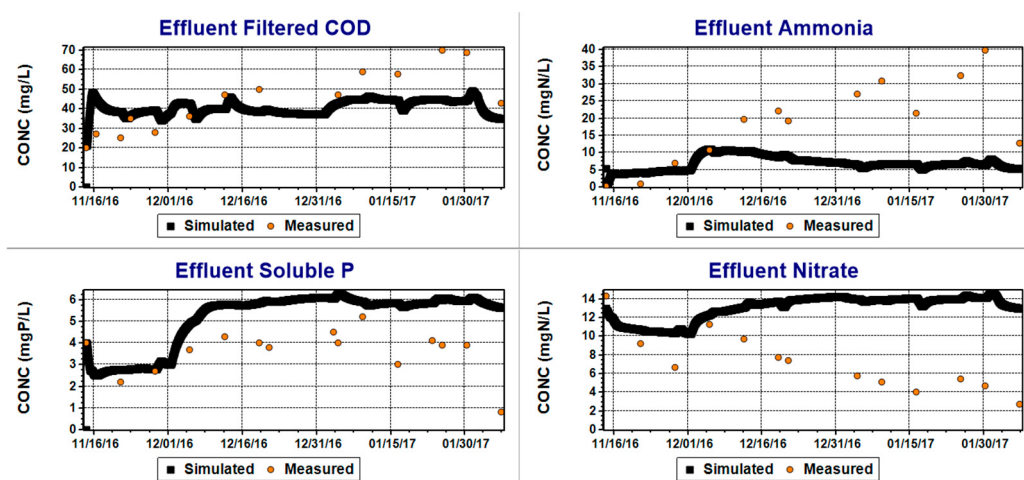

Figure S3. Period II – Effluent simulated concentrations VS measured

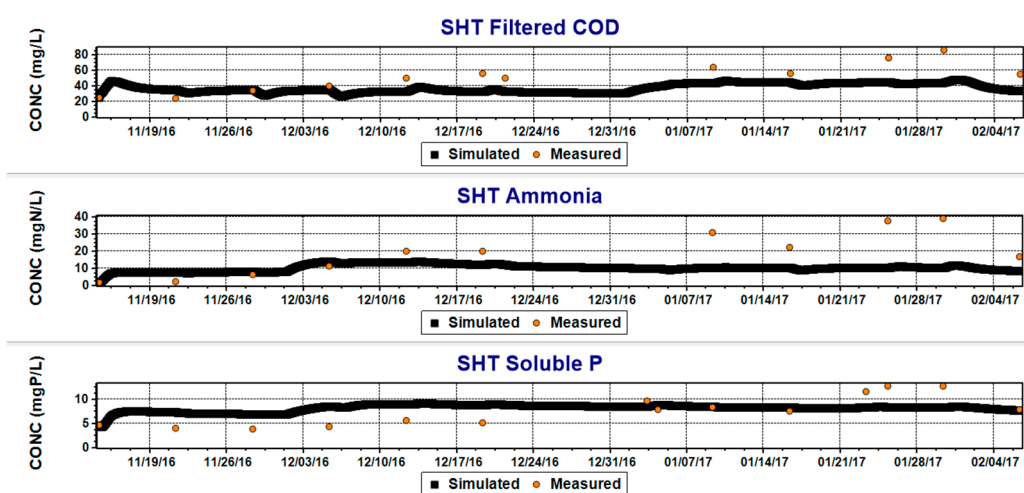

Figure S4. Period II – SHT simulated concentrations VS measured

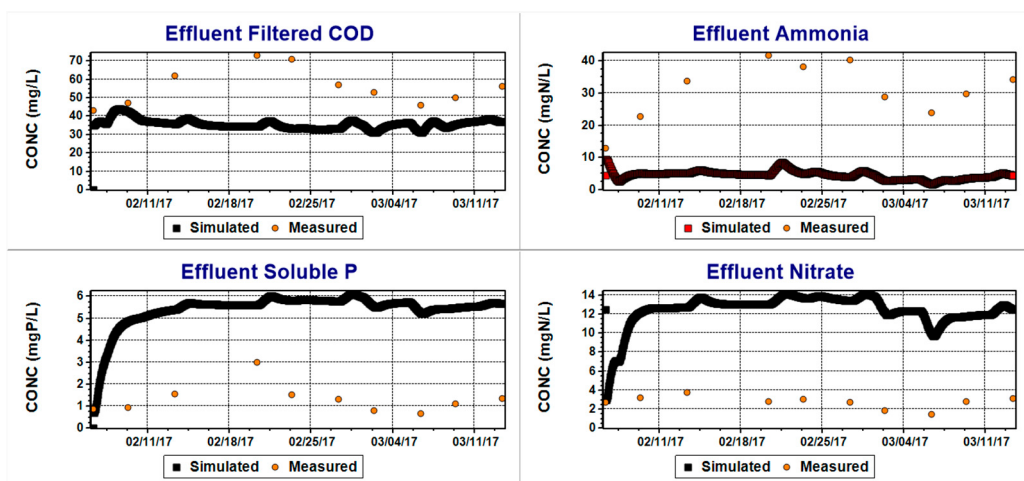

Figure S5. Period III – Effluent simulated concentrations VS measured

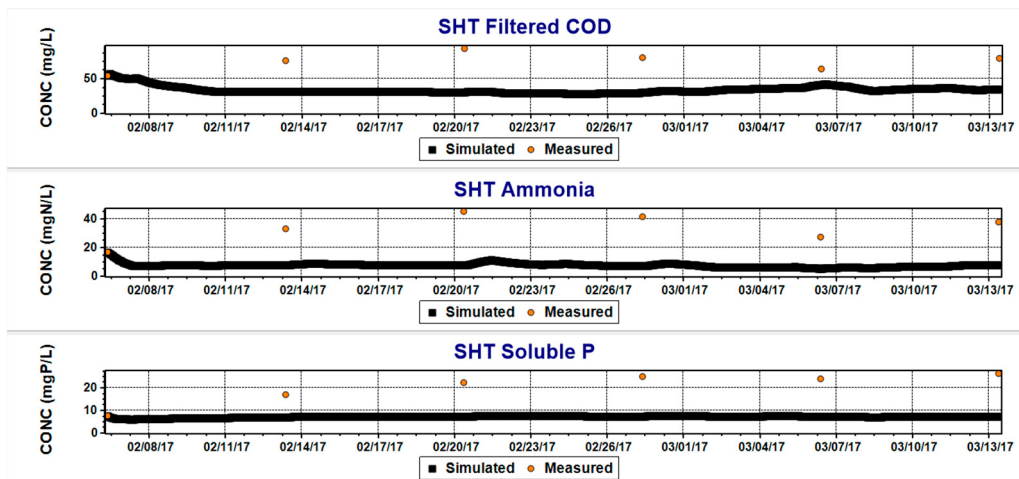

Figure S6. Period III – SHT simulated concentrations VS measured

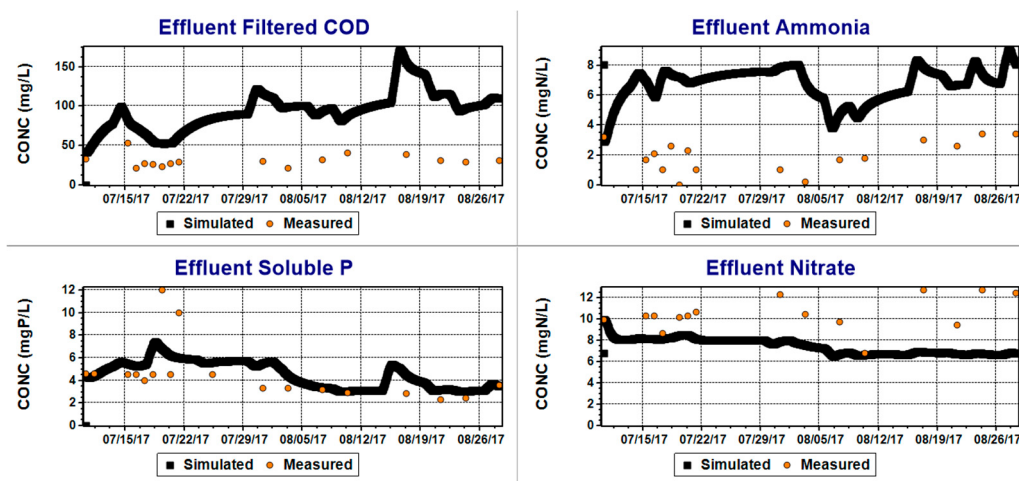

Figure S7. Period V – Effluent simulated concentrations VS measured

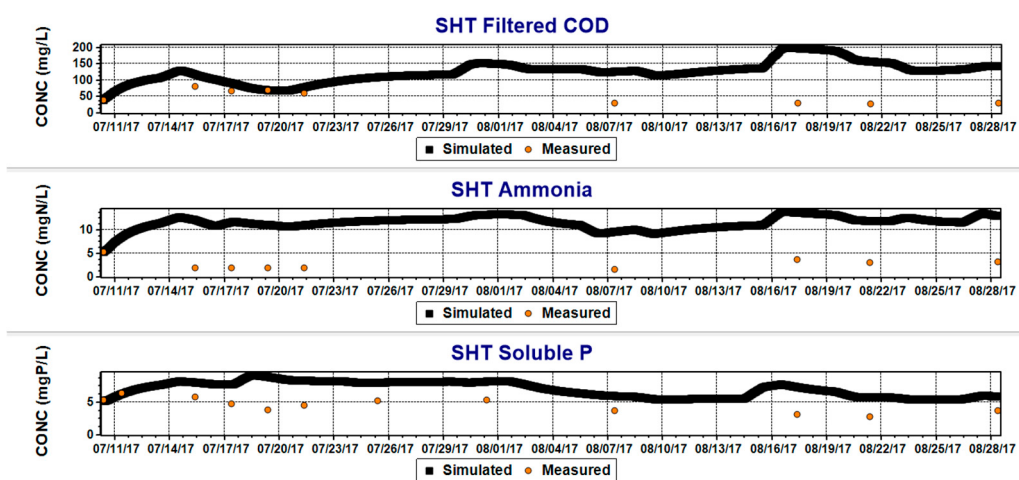

Figure S8. Period V – SHT simulated concentrations VS measured

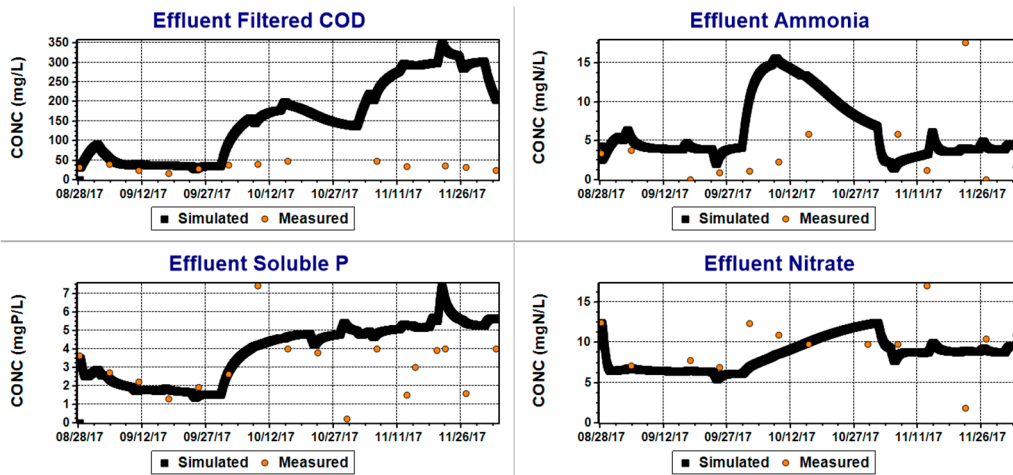

Figure S9. Period VI – Effluent simulated concentrations VS measured

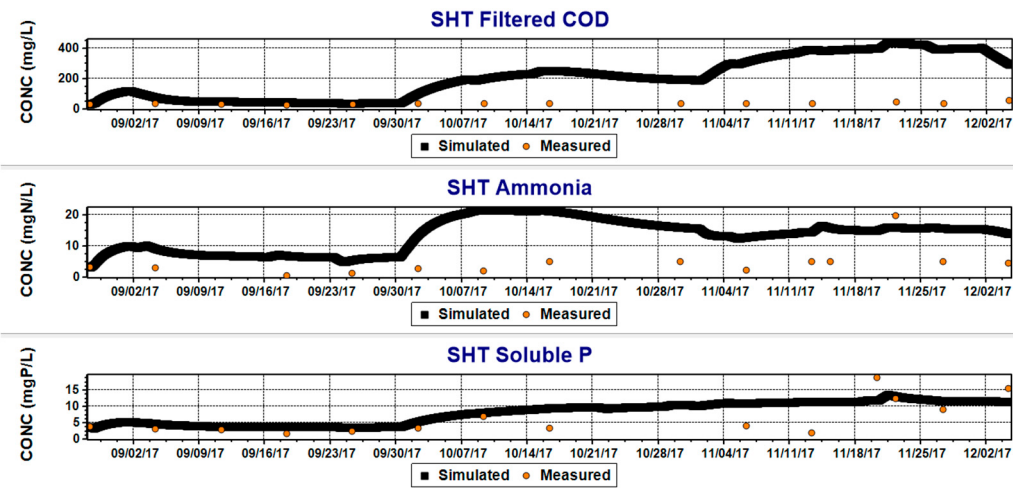

Figure S10. Period VI – SHT simulated concentrations VS measured
